# Supplementary material for: A chloroplast retrograde signal, 3’-phosphoadenosine 5’-phosphate, acts as a secondary messenger in abscisic acid signaling in stomatal closure and germination
Source: eLife journal article supplement (doi:10.7554/elife.23361), 2017-03-21
Supplement: supp [file elife-23361-supp-v1.zip]

### A PAP content in ABA and *sal1* mutants

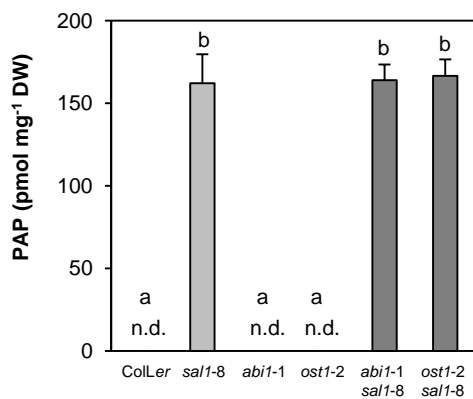

### B SAL1 protein enrichment in epidermal peels

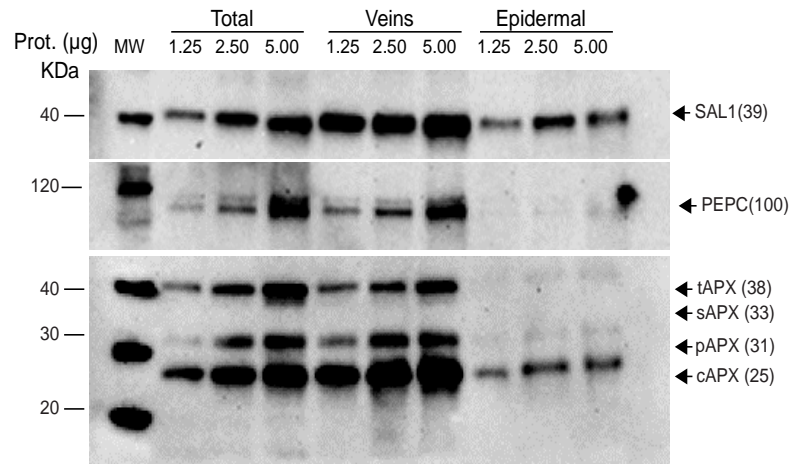

### C SAL1 localisation in guard cells

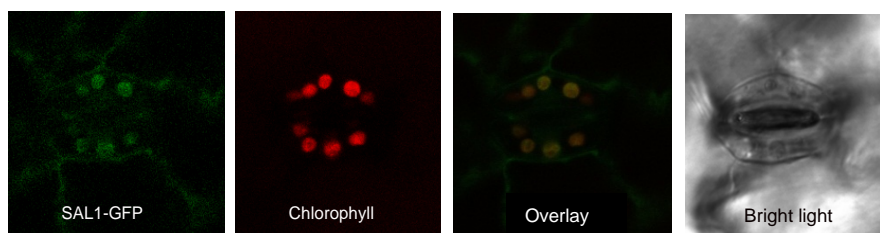

## Figure 1- figure supplement 1. PAP content in single and double mutants; and SAL1 localization in epidermal peels and guard cell chloroplasts.

(A) Quantification of PAP in well-watered (WW) plants shows PAP levels in double mutants (dark bars) were not significantly different to *sal1-8* (light bar). Data are means  $\pm$  SEM,  $n = 5$ . Significant differences ( $p < 0.05$ ) are indicated by a, b. n.d. = not detected. (B) Western blots of total leaf, veins and epidermal peels isolated from 51 day-old Col-0 plants showed SAL1 could be detected in epidermal peels, whereas mesophyll and bundle sheath localized proteins, PEPC and APX were barely detectable. (C) Leaves of adult plants expressing pSAL1:SAL1:GFP examined using a Leica confocal microscope showed GFP fluorescence in the chloroplasts of guard cells.

## Figure 1 – figure supplement 1
