# Supplementary material for: A chloroplast retrograde signal, 3’-phosphoadenosine 5’-phosphate, acts as a secondary messenger in abscisic acid signaling in stomatal closure and germination
Source: eLife journal article supplement (doi:10.7554/elife.23361), 2017-03-21
Supplement: supp [file elife-23361-supp-v1.zip]

**A** Exogenous ABA application to WT and *sal1-8* epidermal leaf peels

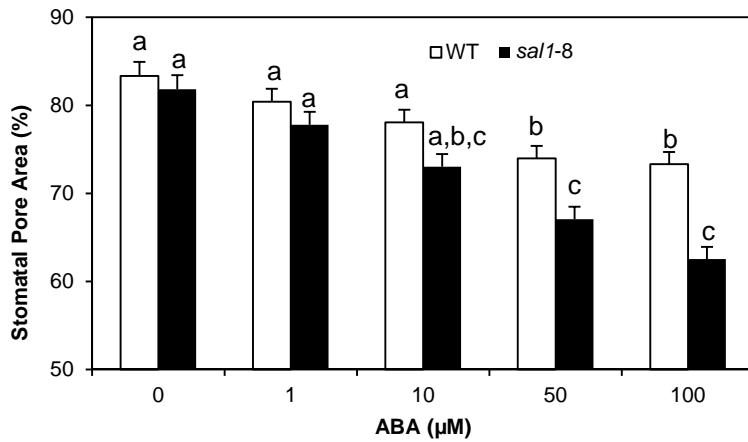

**B** Leaf temperature in ABA-sprayed WT and *sal1-8* plants

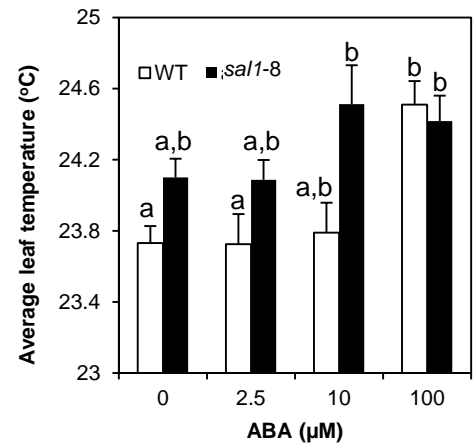

**Figure 1- figure supplement 2. Enhanced ABA sensitivity in guard cells of *sal1-8*.**

**(A)** Stomatal aperture, calculated using measurements of pore width and length, in leaf peels of wild type and *sal1-8* plants treated with 0, 1, 10, 50 and 100 μM for 1 h. Values are means, expressed as a percentage compared to time 0, of 12-16 stomata ± SEM. Significant differences between genotypes and treatments are shown by a,b,c (2-way ANOVA and Tukey's HSD,  $p < 0.05$ ).

**(B)** Thermography of 35-day old wild type and *sal1-8* intact plants sprayed with 0, 2.5, 10 or 100 μM ABA. Mean and SEM of leaf temperature from four individual plants per genotype are shown. Plants were returned to growth chamber and temperature measured after 2 hours. Significant differences between genotypes are treatments are shown by a,b (2-way ANOVA and Tukey's HSD,  $p < 0.05$ ).

**Figure 1 – figure supplement 2**
