# Supplementary material for: A chloroplast retrograde signal, 3’-phosphoadenosine 5’-phosphate, acts as a secondary messenger in abscisic acid signaling in stomatal closure and germination
Source: eLife journal article supplement (doi:10.7554/elife.23361), 2017-03-21
Supplement: supp [file elife-23361-supp-v1.zip]

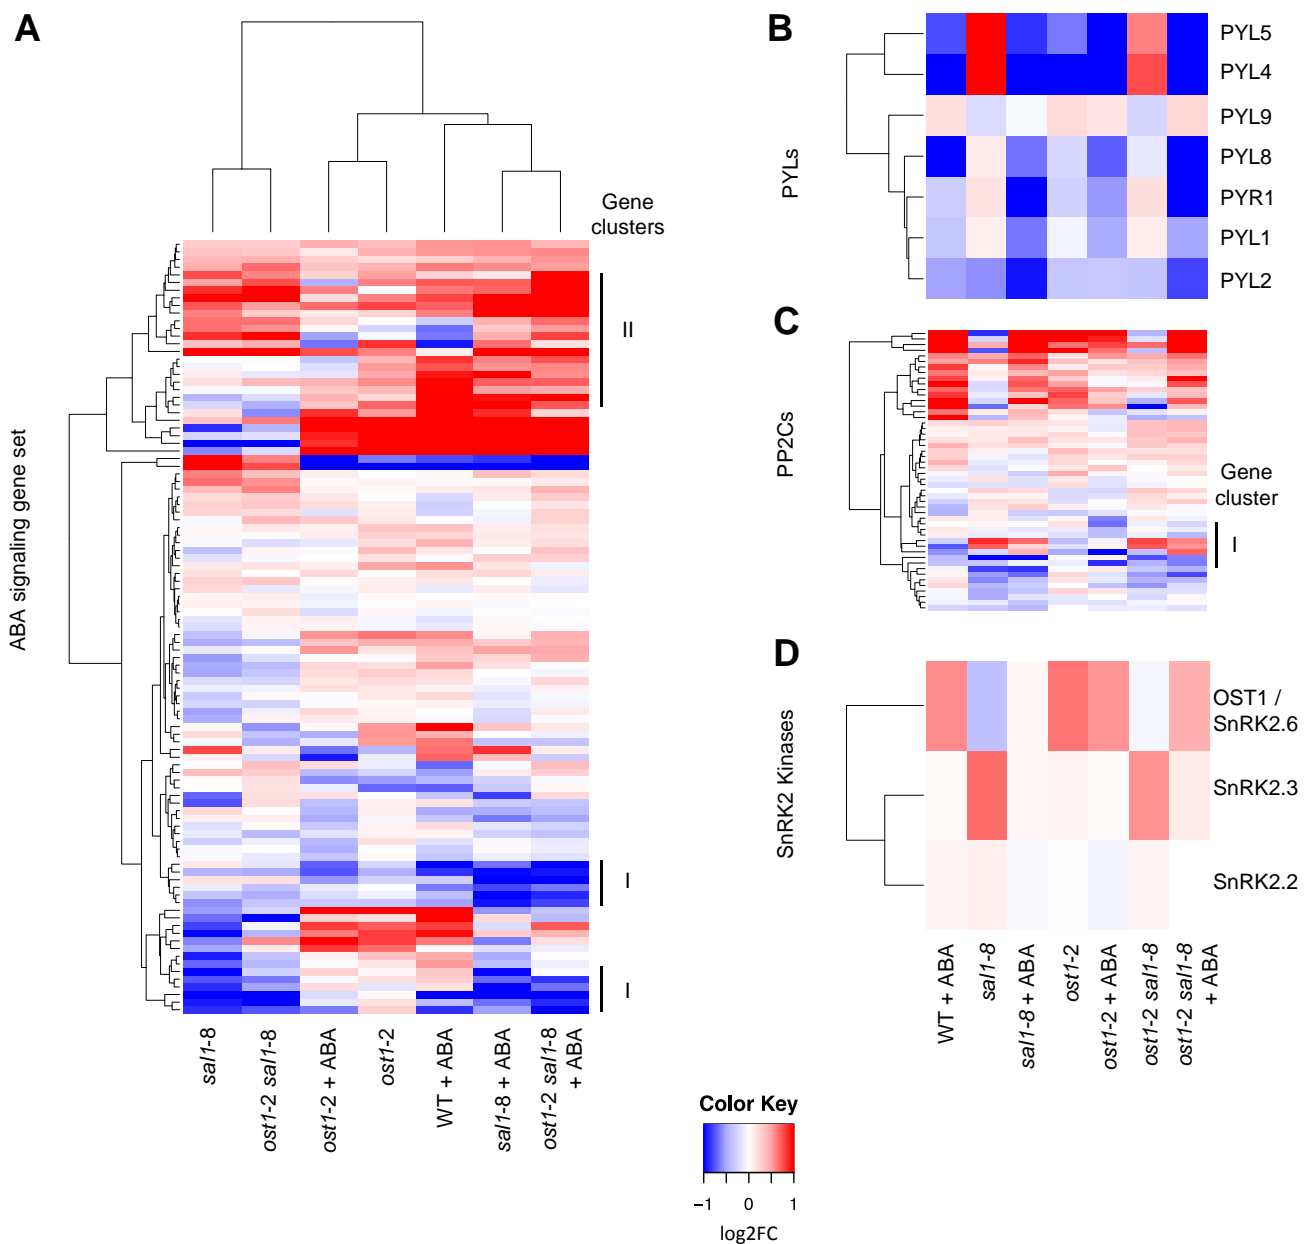

**Figure 3 – figure supplement 2. Changes in gene expression of ABA receptors, PP2Cs and SnRKs in response to ABA**

Hierarchical clustering of the expression of **(A)** ABA signalling gene sets in wild type, *ost1-2*, *sal1-8* and *ost1-2 sal1-8* +/- ABA; **(B)** seven PYLs; **(B)** 52 PP2C genes; and **(C)** three SnRK2 kinases. For all hierarchical clustering analyses performed, gene expression was compared to wild type untreated of the four genotypes +/- ABA. Scale = log<sub>2</sub>, blue lower and red higher expression. The scale has been condensed such that the red and blue colours at the end of the scale encompass all fold-changes greater or equal to 2, or less than or equal to 0.5, respectively.

**Figure 3 – figure supplement 2**
