# Supplementary material for: A chloroplast retrograde signal, 3’-phosphoadenosine 5’-phosphate, acts as a secondary messenger in abscisic acid signaling in stomatal closure and germination
Source: eLife journal article supplement (doi:10.7554/elife.23361), 2017-03-21
Supplement: supp [file elife-23361-supp-v1.zip]

## A SAL1 expression in different tissues

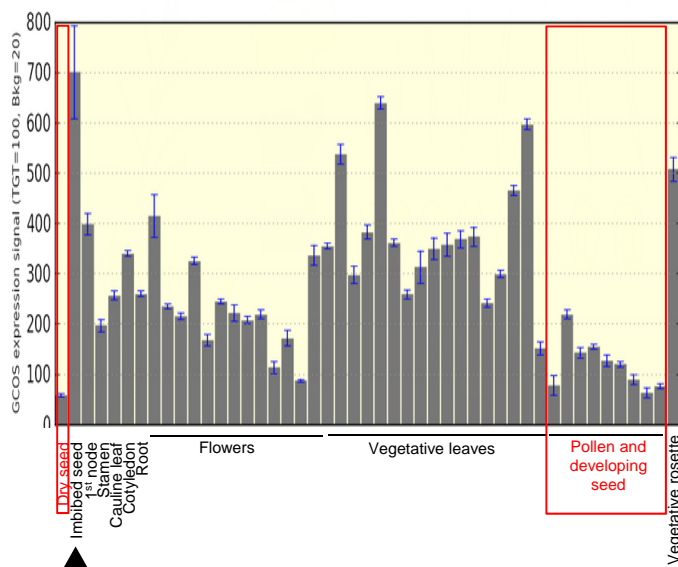

## B SAL1 relative expression

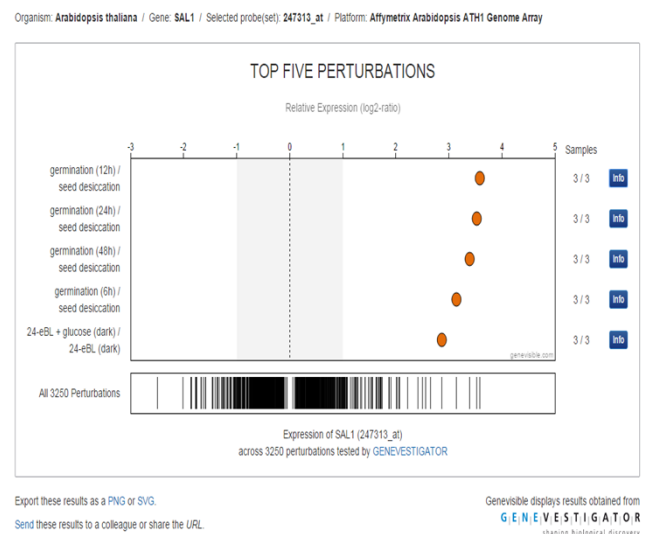

## Figure 8 – figure supplement 1. Role of SAL1 and PAP in regulating seed germination.

Wild type seed differentially regulates *SAL1* transcript and protein abundance to accumulate more PAP than leaves. **(A)** *SAL1* expression is the lowest during seed development and in dry seed (red boxes), and highest when the seed is imbibed (black arrow). Data visualized from publically-deposited microarray data using eFP Browser. **(B)** Analysis of publically-deposited microarray data in Genevestigator using the Genevisible tool reveals that the top four environmental changes that exert the highest degree of change in *SAL1* transcript abundance, out of >3,000 perturbations, are the transition from dry seed to germinating seed. This suggests that the transcriptional repression of *SAL1* and the associated PAP accumulation in seed are key aspects of seed development and dormancy.

## Figure 8 – figure supplement 1
