# Supplementary material for: A chloroplast retrograde signal, 3’-phosphoadenosine 5’-phosphate, acts as a secondary messenger in abscisic acid signaling in stomatal closure and germination
Source: eLife journal article supplement (doi:10.7554/elife.23361), 2017-03-21
Supplement: supp [file elife-23361-supp-v1.zip]

**A** Stomatal density, index and opening area in ABA and *sal1* mutants

| Genotype             | Stomatal characteristics |                                           |                                                 |                                           |
|----------------------|--------------------------|-------------------------------------------|-------------------------------------------------|-------------------------------------------|
|                      | Stomatal index           | Stomatal density (N per mm <sup>2</sup> ) | Epidermal cell density (N per mm <sup>2</sup> ) | Total stomatal opening area per leaf area |
| Col-0                | 20.4 ± 1.7               | 197 ± 37                                  | 759 ± 66                                        | (1.09 ± 0.58) × 10 <sup>-3</sup>          |
| <i>sal1-8</i>        | 20.6 ± 1.8               | 307 ± 56                                  | 1176 ± 168                                      | (1.80 ± 0.88) × 10 <sup>-3</sup>          |
| Ler                  | 12.3 ± 1.7               | 127 ± 15                                  | 910 ± 93                                        | (2.06 ± 0.68) × 10 <sup>-3</sup>          |
| <i>abi1-1</i>        | 17.2 ± 2.5               | 231 ± 35                                  | 1113 ± 75                                       | (4.61 ± 1.01) × 10 <sup>-3</sup>          |
| <i>ost1-2</i>        | 18.0 ± 2.9               | 214 ± 33                                  | 985 ± 147                                       | (5.96 ± 1.32) × 10 <sup>-3</sup>          |
| <i>abi1-1 sal1-8</i> | 13.4 ± 0.9*              | 376 ± 45*                                 | 2428 ± 284*                                     | (5.39 ± 1.17) × 10 <sup>-3</sup> (n.s.)   |
| <i>ost1-2 sal1-8</i> | 11.9 ± 0.7*              | 359 ± 33*                                 | 2666 ± 357*                                     | (5.51 ± 1.07) × 10 <sup>-3</sup> (n.s.)   |

**B** ColLer and Col-0 responses to ABA

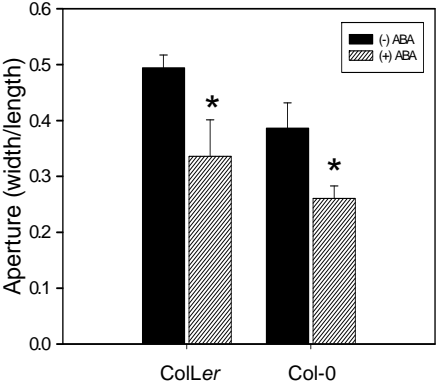

**C** ABA insensitivity in *ost1* (Col)

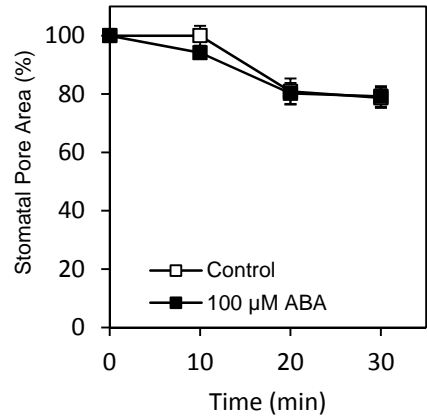

**D** Restoration of stomatal closure in drought-stressed *ost1sal1-6* (Col)

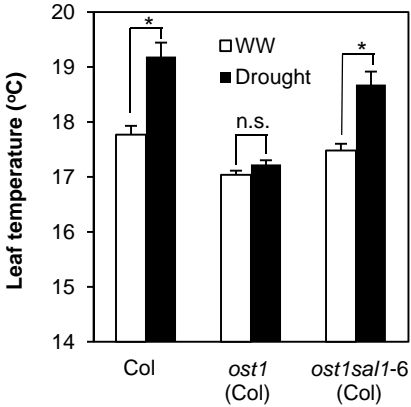

**E** ABA content in ABA and *sal1* mutants

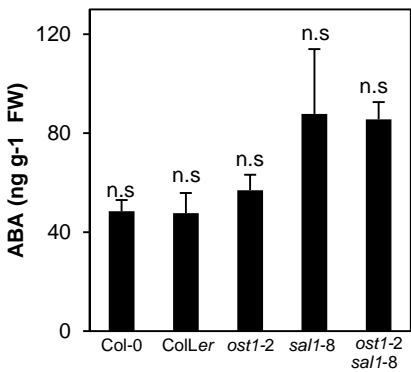

**F** Stomatal closure in the chloroplastic calcium sensor mutant *cas1* in response to ABA and PAP

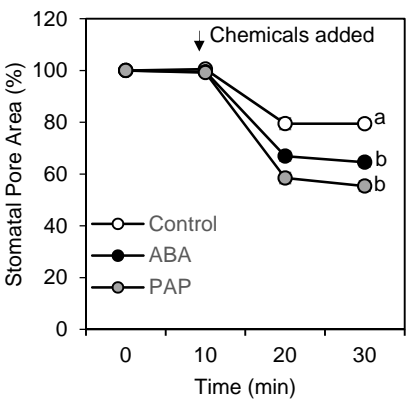

**Figure 1 – figure supplement 3**

**Figure 1 – figure supplement 3. The biochemistry, physiology and stomatal features of single and double mutants, and testing of PAP action via pathogen signaling.**

**(A)** Stomata density, epidermal cell density, stomatal index and total stomatal opening area per leaf area from CryoSEM images of abaxial surface of leaves of six week-old plants. Stomatal index is calculated according to the equation:  $\text{Stomatal index} = [(\text{stomatal density}) / (\text{stomatal density} + \text{epidermal cell density})] * 100$ . Calculations were performed from five different fields of view per leaf per genotype,  $n > 30$ . The experiments were performed twice with similar results. Significant differences at  $p < 0.05$  (\*) or no significant difference (n.s.) are shown for *abi1-1 sal1-8* to *abi1-1* and *ost1-2 sal1-8* to *ost1-2*, respectively. **(B)** Effect of ABA on the stomatal aperture of Col-0 vs ColLer hybrid of leaf peels from five- to six-week old plants after 2 h of 50  $\mu\text{M}$  ABA. **(C)** Effect of ABA on the stomatal aperture of *ost1* (Col-0) treated with either mock control buffer or 100  $\mu\text{M}$  ABA for 30 minutes. Results are mean  $\pm$  SE of 15 stomata per treatment. **(D)** Stomatal closure, as assayed by leaf temperature using infrared thermography, in well-watered and drought-stressed WT, *ost1* and *ost1sal1-6* (all in Col-0 background). Values are mean  $\pm$  SE of five individual plants per genotype. Significant differences are shown for  $p < 0.05$  (\*). **(E)** Effect of the *sal1-8* mutation on total leaf ABA content. The ABA content in *sal1-8* and *ost1-2 sal1-8* were marginally higher but not statistically different to ColLer or *ost1-2* (ANOVA,  $p = 0.09$ ). Results are means and standard error of 3 x 100 mg pooled two-week old seedlings. **(F)** Stomatal closure in leaf peels of the chloroplastic calcium sensor mutant, *cas1*, after treatment with 100  $\mu\text{M}$  ABA, 100  $\mu\text{M}$  PAP or control measuring buffer (Means  $\pm$  SEM of  $>40$  stomata per genotype). Significant differences at  $t = 30$  minutes (a, b;  $p < 0.05$ ) are shown.
